# Supplementary material for: A single introduction of wild rabbits triggered the biological invasion of Australia
Source: PubMed Central journal article supplement — Proc Natl Acad Sci U S A. 2022 Aug 22;119(35):e2122734119. doi: 10.1073/pnas.2122734119 (PMC9436340; doi:10.1073/pnas.2122734119), 2022-08-22
Supplement: pnas.2122734119.sapp.pdf [file pnas.2122734119.sapp.pdf]

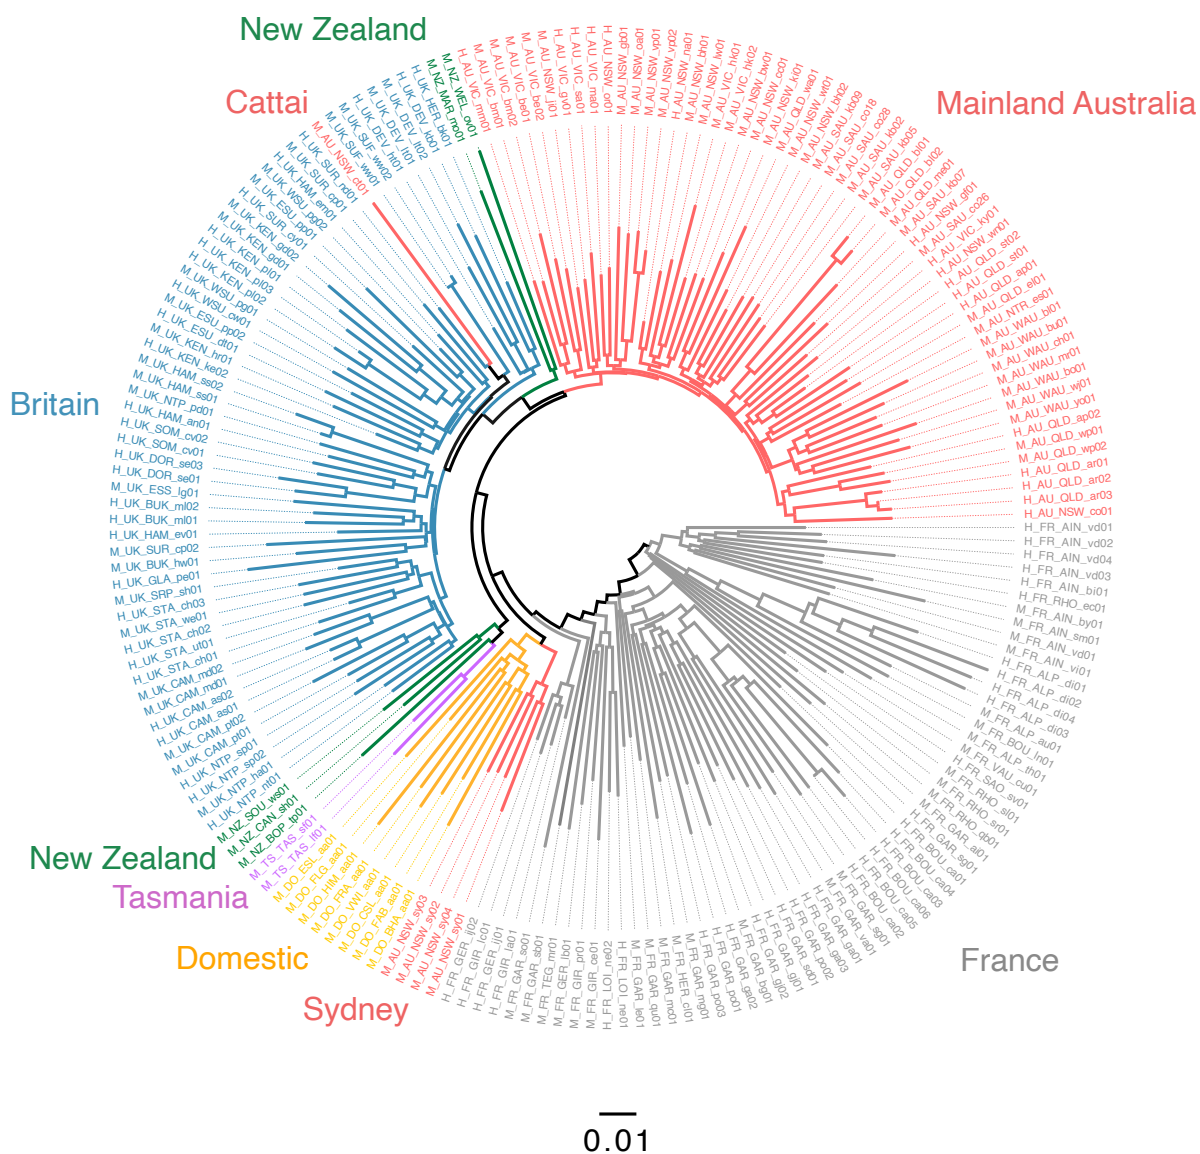

**Figure S1** - Mid-point rooted maximum likelihood tree of all individual rabbits used in this dataset, coloured according to the population of origin.

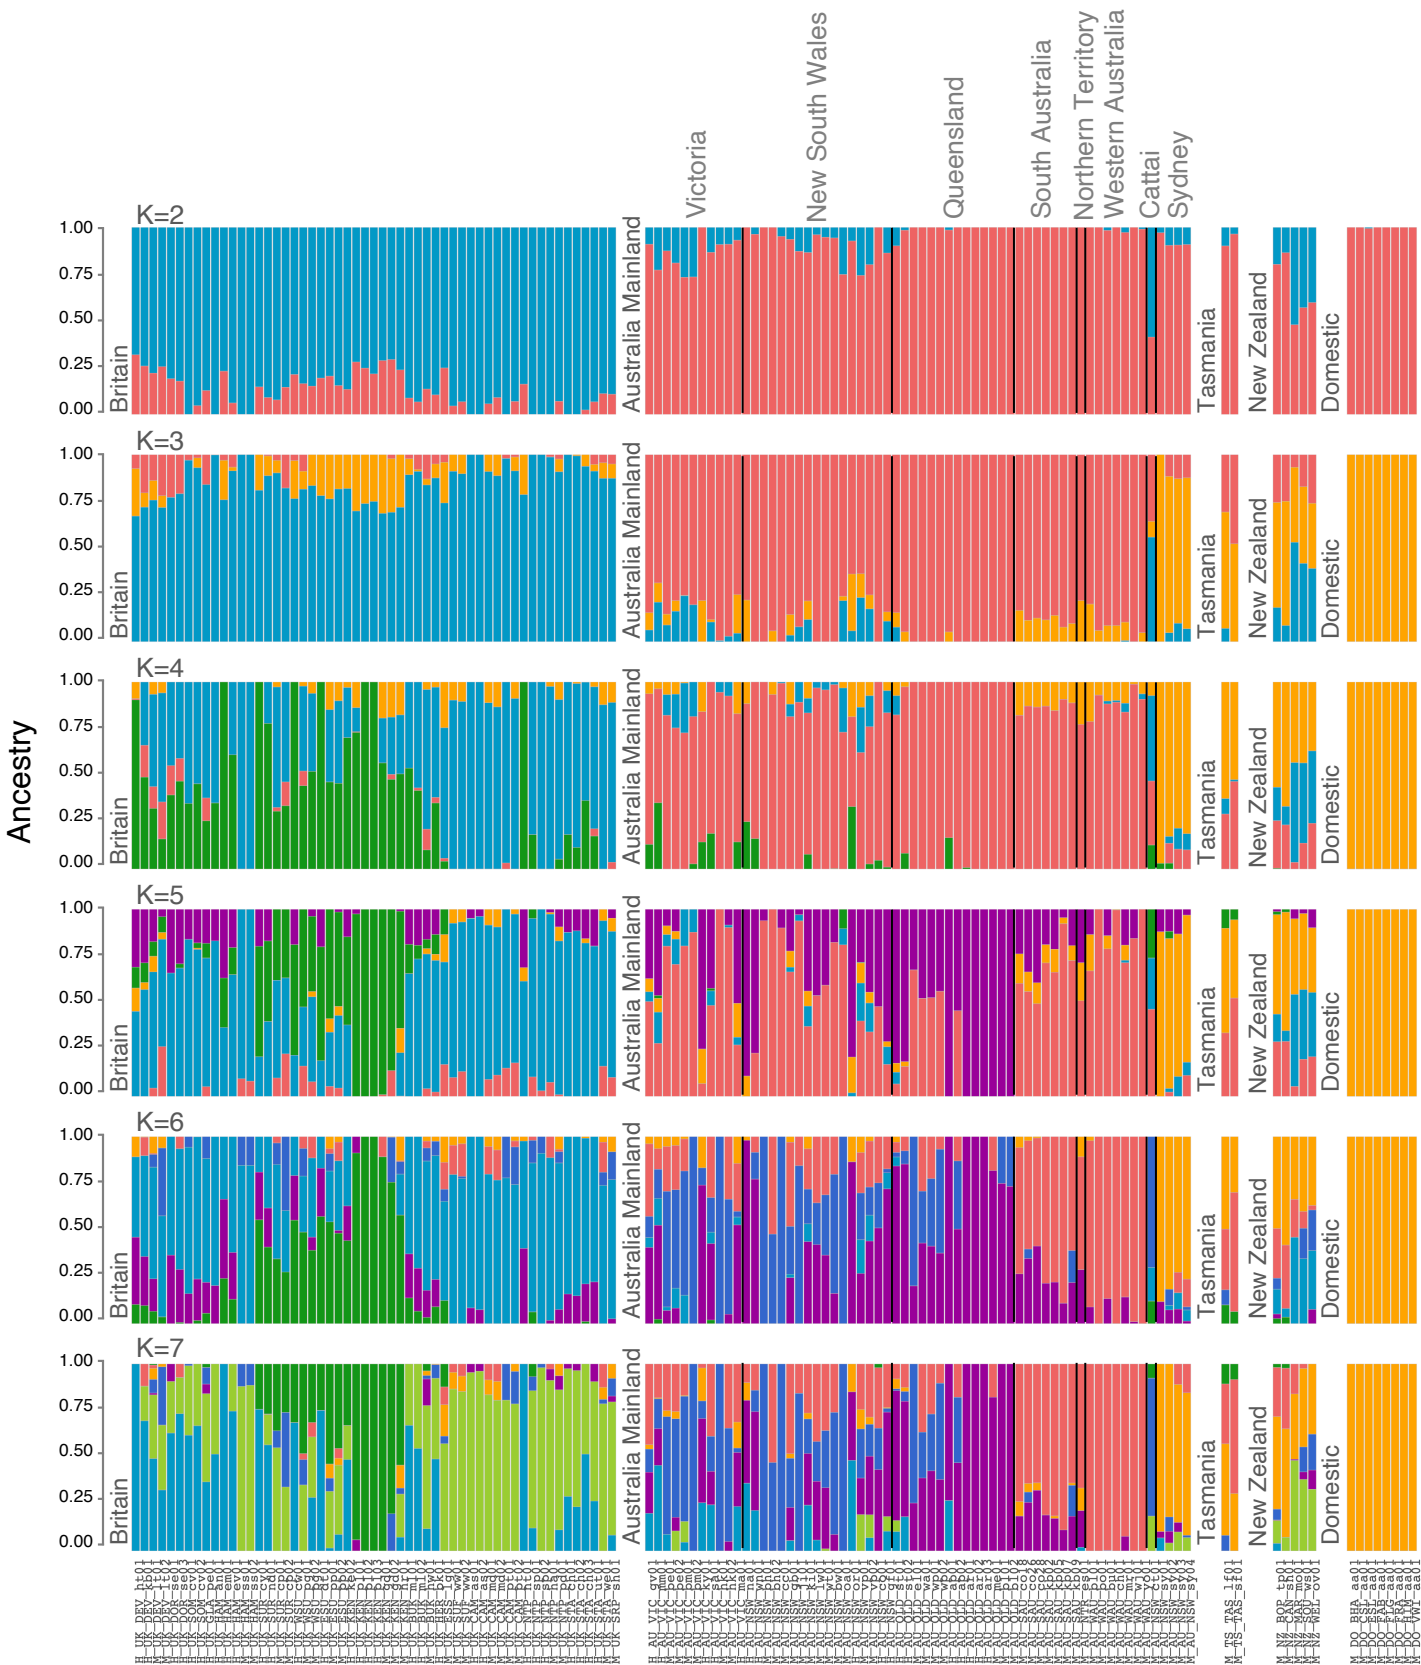

**Figure S2** - Ancestry fractions estimated with Admixture assuming  $K$  ancestral populations ( $K=2$  to  $K=7$ ), separated between British, Australia, Tasmania, New Zealand and Domestic population. Black bars separate Australian mainland sub-populations.

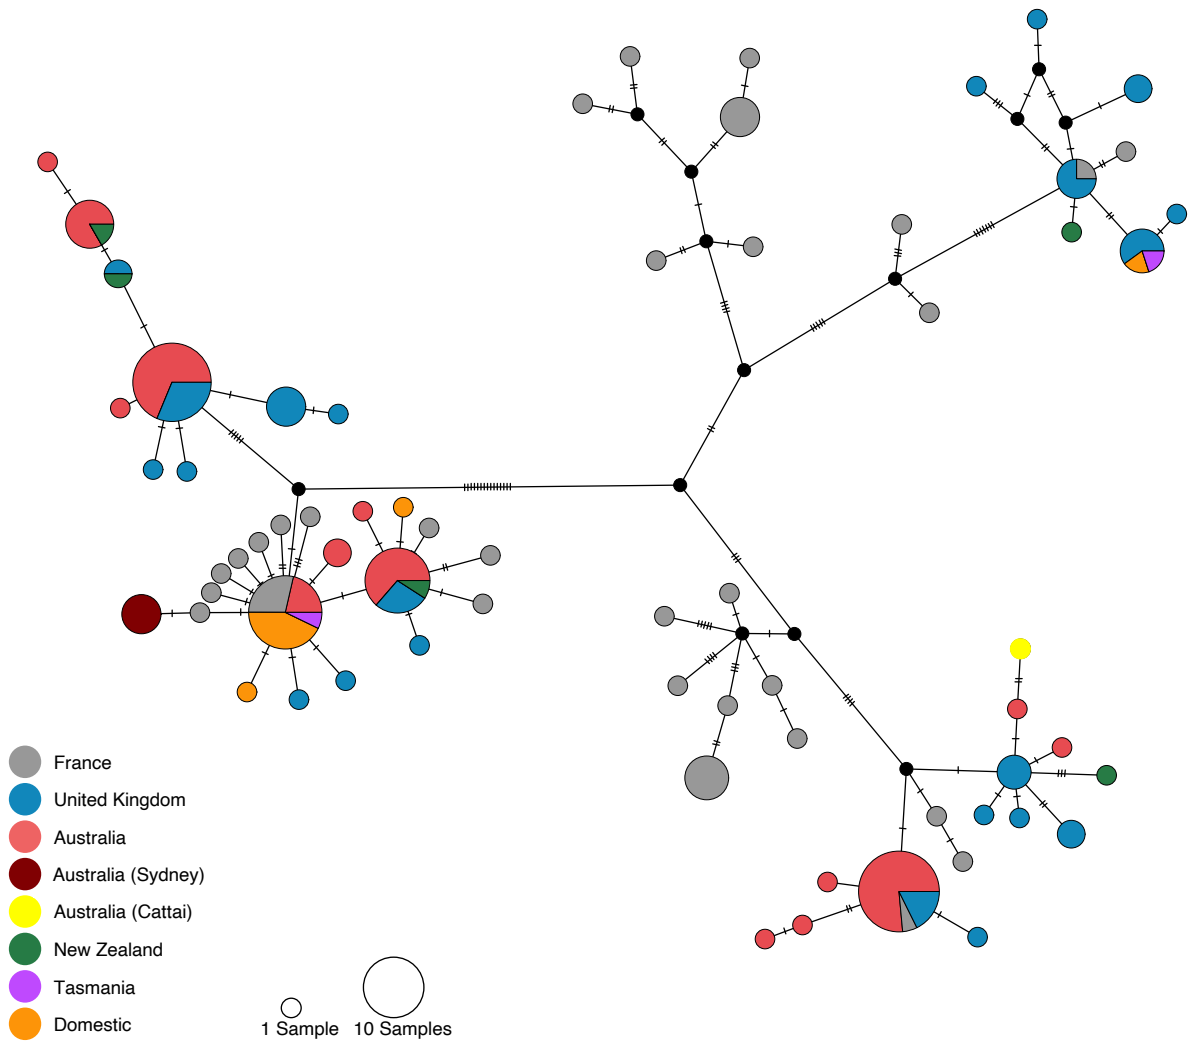

**Figure S3** - Median-joining haplotype network of mtDNA genomes. Colours correspond to the population of origin. Mainland Australian individuals that were inferred to result from an introduction independent from Barwon Park (Sydney and Cattai) are coloured differently. The size of the circles is proportional to the number of individuals that share the same haplotype.

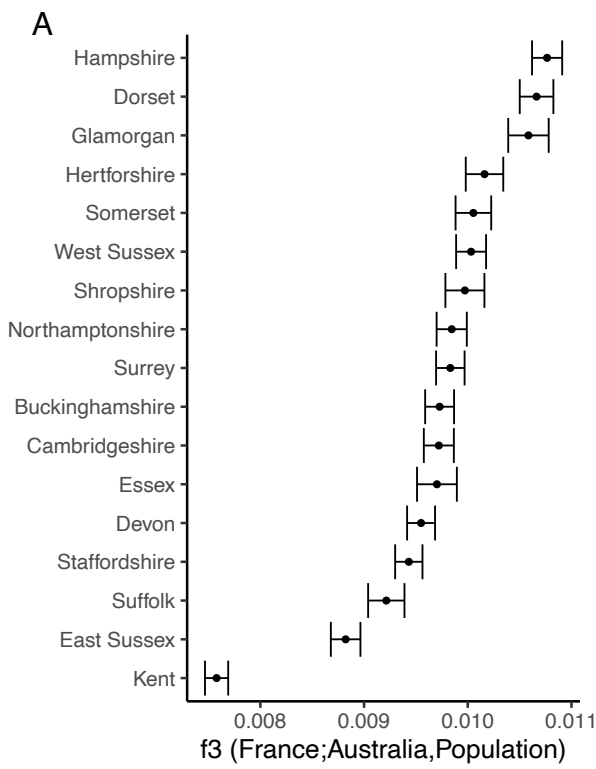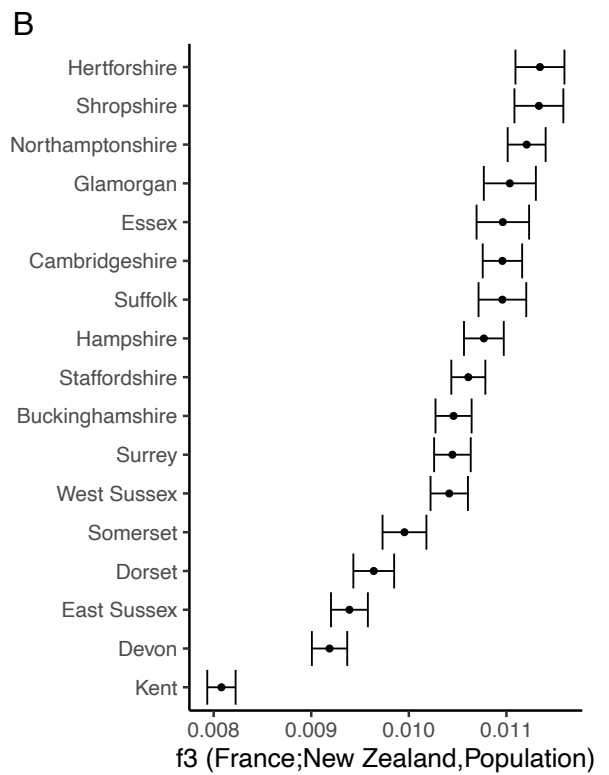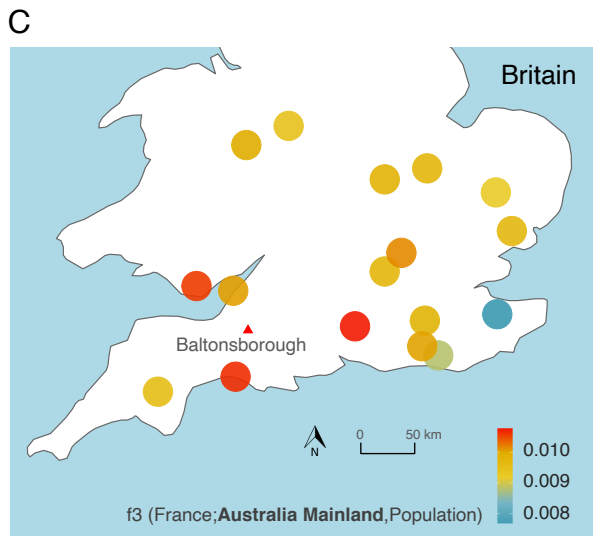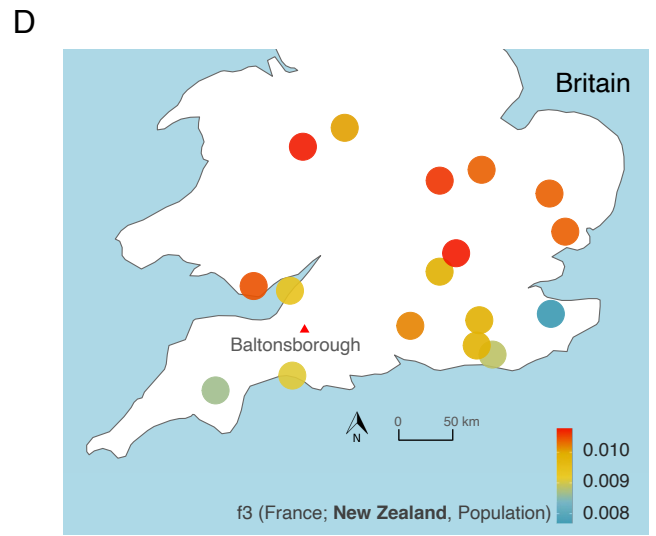

**Figure S4** –  $f_3$ -statistic analysis reflecting the shared genetic drift between mainland Australia (excluding Cattai and Sydney) (A)/New Zealand (B), and 17 British rabbit populations using France as an outgroup. Map of the South of Britain with 17 populations coloured according to the  $f_3$  statistics value, reflecting the degree of shared ancestry with Australia (C)/New Zealand (D). Populations were defined based on the British county of each rabbit. The red triangle marks the location of Baltonsborough village, the residence of the Austin family where the wild rabbits imported to Barwon Park are believed to be originated from.

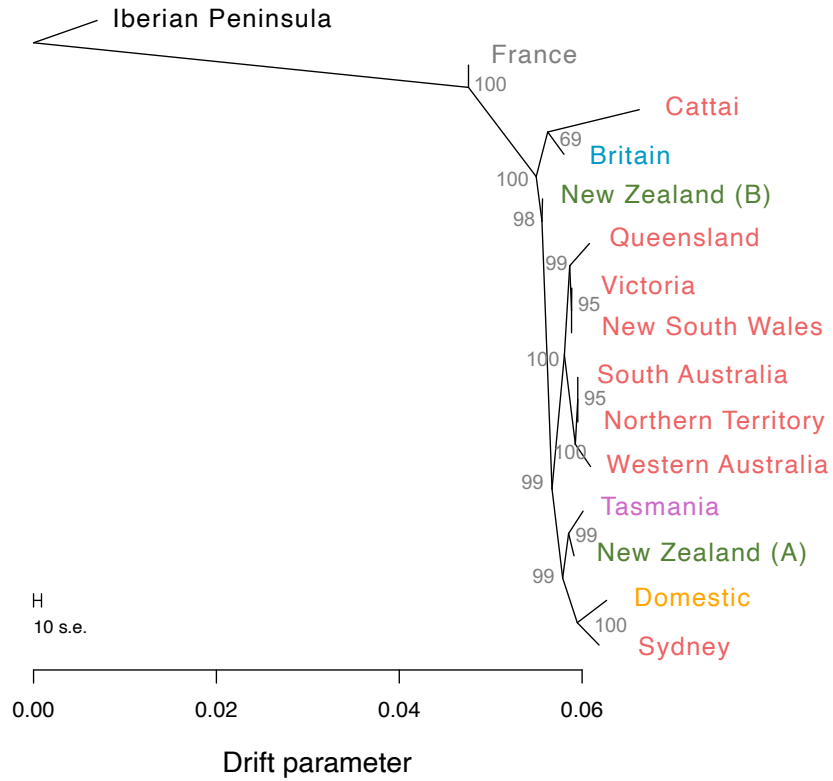

**Figure S5** - Historical relationships among populations reconstructed with allele frequency data using the TreeMix program. The branch lengths are proportional to the amount of genetic drift, and the scale bar shows ten times the mean standard error of the entries in the sample covariance matrix. The numbers on branches are percent bootstrap support calculated by resampling blocks of SNPs 1000 times. New Zealand (A) and New Zealand (B) populations correspond to the two clusters of individuals observed in the PCA.

**Table S1** - List of all samples used in this study.

| <b>Sample<sup>a</sup></b> | <b>Published data<sup>b</sup></b> | <b>Year<sup>c</sup></b> | <b>Origin<sup>d</sup></b> | <b>State/County/Dept.<sup>e</sup></b> | <b>Locality/Breed<sup>g</sup></b> | <b>Lat<sup>h</sup></b> | <b>Long<sup>i</sup></b> | <b>Representative of Population<sup>j</sup></b> |
|---------------------------|-----------------------------------|-------------------------|---------------------------|---------------------------------------|-----------------------------------|------------------------|-------------------------|-------------------------------------------------|
| M_AU_NSW_bh01             | Alves et al 2019                  | 2012                    | Australia                 | New South Wales                       | Broken Hill                       | -31.956                | 141.465                 | -                                               |
| M_AU_NSW_bh02             | Alves et al 2019                  | 2012                    | Australia                 | New South Wales                       | Broken Hill                       | -31.956                | 141.465                 | -                                               |
| M_AU_NSW_bw01             | Alves et al 2019                  | 2013                    | Australia                 | New South Wales                       | Blowering                         | -35.506                | 148.273                 | -                                               |
| M_AU_NSW_cc01             | Alves et al 2019                  | 2013                    | Australia                 | New South Wales                       | Coolac                            | -34.927                | 148.166                 | -                                               |
| M_AU_NSW_ct01             | Alves et al 2019                  | 2007                    | Australia                 | New South Wales                       | Cattai National park              | -33.320                | 150.907                 | -                                               |
| M_AU_NSW_gb01             | Alves et al 2019                  | 2013                    | Australia                 | New South Wales                       | Goombargana                       | -35.702                | 146.583                 | VIC/NSW                                         |
| M_AU_NSW_ji01             | Alves et al 2019                  | 2013                    | Australia                 | New South Wales                       | Jindera                           | -35.950                | 146.881                 | VIC/NSW                                         |
| M_AU_NSW_ki01             | Alves et al 2019                  | 2013                    | Australia                 | New South Wales                       | King's                            | -35.676                | 146.898                 | VIC/NSW                                         |
| M_AU_NSW_lw01             | Alves et al 2019                  | 2010                    | Australia                 | New South Wales                       | Little Whiskters Road (Carwoola)  | -35.292                | 149.300                 | -                                               |
| M_AU_NSW_oa01             | Alves et al 2019                  | 2007                    | Australia                 | New South Wales                       | Oakey Creek (near Bathurst)       | -33.255                | 150.300                 | -                                               |
| M_AU_NSW_sy01             | New data                          | 2018                    | Australia                 | New South Wales                       | Avalon                            | -33.607                | 151.325                 | -                                               |
| M_AU_NSW_sy02             | New data                          | 2018                    | Australia                 | New South Wales                       | Avalon                            | -33.607                | 151.325                 | -                                               |
| M_AU_NSW_sy03             | New data                          | 2018                    | Australia                 | New South Wales                       | Avalon                            | -33.607                | 151.325                 | -                                               |
| M_AU_NSW_sy04             | New data                          | 2018                    | Australia                 | New South Wales                       | East Lake Golf Course             | -33.926                | 151.221                 | -                                               |
| M_AU_NSW_vp01             | Alves et al 2019                  | 2007                    | Australia                 | New South Wales                       | Valpine (Near Bathurst)           | -33.187                | 149.641                 | -                                               |
| M_AU_NSW_vp02             | Alves et al 2019                  | 2007                    | Australia                 | New South Wales                       | Valpine (Near Bathurst)           | -33.187                | 149.641                 | -                                               |
| M_AU_NSW_wt01             | Alves et al 2019                  | 2007                    | Australia                 | New South Wales                       | Wattagan (near Canberra)          | -35.152                | 149.072                 | -                                               |
| M_AU_NTR_es01             | New data                          | 2011                    | Australia                 | Northern Australia                    | Erdunda Station                   | -25.120                | 133.114                 | -                                               |
| M_AU_QLD_bl01             | Alves et al 2019                  | 2013                    | Australia                 | Queensland                            | Blue Mountain Heights             | -27.502                | 151.952                 | QLD                                             |
| M_AU_QLD_bl02             | Alves et al 2019                  | 2013                    | Australia                 | Queensland                            | Blue Mountain Heights             | -27.502                | 151.952                 | QLD                                             |
| M_AU_QLD_el01             | Alves et al 2019                  | 2013                    | Australia                 | Queensland                            | Elbow valley                      | -28.438                | 152.205                 | QLD                                             |
| M_AU_QLD_me01             | Alves et al 2019                  | 2013                    | Australia                 | Queensland                            | Merrits                           | -27.362                | 152.028                 | QLD                                             |
| M_AU_QLD_wa01             | Alves et al 2019                  | 2013                    | Australia                 | Queensland                            | Warwick                           | -28.368                | 151.966                 | QLD                                             |
| M_AU_QLD_wp01             | Alves et al 2019                  | 2013                    | Australia                 | Queensland                            | Washpool                          | -28.240                | 151.917                 | QLD                                             |

|               |                  |      |           |                   |                              |         |         |         |
|---------------|------------------|------|-----------|-------------------|------------------------------|---------|---------|---------|
| M_AU_QLD_wp02 | Alves et al 2019 | 2013 | Australia | Queensland        | Washpool                     | -28.240 | 151.917 | QLD     |
| M_AU_SAU_co18 | New data         | 2018 | Australia | South Australia   | Coonanna                     | -29.796 | 140.947 | SAU     |
| M_AU_SAU_co26 | New data         | 2018 | Australia | South Australia   | Coonanna                     | -29.796 | 140.947 | SAU     |
| M_AU_SAU_co28 | New data         | 2018 | Australia | South Australia   | Coonanna                     | -29.796 | 140.947 | SAU     |
| M_AU_SAU_kb02 | New data         | 2018 | Australia | South Australia   | Kain Bore                    | -29.349 | 140.589 | SAU     |
| M_AU_SAU_kb05 | New data         | 2018 | Australia | South Australia   | Kain Bore                    | -29.349 | 140.589 | SAU     |
| M_AU_SAU_kb07 | New data         | 2018 | Australia | South Australia   | Kain Bore                    | -29.349 | 140.589 | SAU     |
| M_AU_SAU_kb09 | New data         | 2018 | Australia | South Australia   | Kain Bore                    | -29.349 | 140.589 | SAU     |
| M_AU_VIC_be01 | Alves et al 2019 | 2009 | Australia | Victoria          | Bendigo                      | -36.758 | 144.284 | VIC/NSW |
| M_AU_VIC_be02 | Alves et al 2019 | 2009 | Australia | Victoria          | Bendigo                      | -36.758 | 144.284 | VIC/NSW |
| M_AU_VIC_bm01 | Alves et al 2019 | 2009 | Australia | Victoria          | Bacchus Marsh                | -37.676 | 144.439 | VIC/NSW |
| M_AU_VIC_bm02 | Alves et al 2019 | 2009 | Australia | Victoria          | Bacchus Marsh                | -37.676 | 144.439 | VIC/NSW |
| M_AU_VIC_hk01 | Alves et al 2019 | 2009 | Australia | Victoria          | Hattah Kulkyne National Park | -34.608 | 142.303 | -       |
| M_AU_VIC_hk02 | Alves et al 2019 | 2009 | Australia | Victoria          | Hattah Kulkyne National Park | -34.608 | 142.303 | -       |
| M_AU_WAU_bi01 | New data         | 2017 | Australia | Western Australia | Bibra Lake                   | -32.091 | 115.831 | WAU     |
| M_AU_WAU_bo01 | New data         | 2017 | Australia | Western Australia | Bouvard                      | -32.690 | 115.642 | WAU     |
| M_AU_WAU_bu01 | New data         | 2016 | Australia | Western Australia | Bullsbrook                   | -31.692 | 116.071 | WAU     |
| M_AU_WAU_ch01 | New data         | 2016 | Australia | Western Australia | Chittering                   | -31.570 | 116.069 | WAU     |
| M_AU_WAU_mr01 | New data         | 2016 | Australia | Western Australia | Margaret River               | -33.975 | 115.101 | WAU     |
| M_AU_WAU_wj01 | New data         | 2016 | Australia | Western Australia | Winnejup                     | -34.017 | 116.334 | WAU     |
| M_AU_WAU_yo01 | New data         | 2016 | Australia | Western Australia | Yornup                       | -34.021 | 116.123 | WAU     |
| H_AU_NSW_co01 | Alves et al 2019 | 1902 | Australia | New South Wales   | Coonamble                    | -30.950 | 148.400 | -       |
| H_AU_NSW_gf01 | Alves et al 2019 | 1924 | Australia | New South Wales   | Guy Fawkes District          | -30.500 | 152.500 | -       |
| H_AU_NSW_na01 | Alves et al 2019 | 1900 | Australia | New South Wales   | Narrandera                   | -34.750 | 146.550 | -       |
| H_AU_NSW_or01 | Alves et al 2019 | 1956 | Australia | New South Wales   | Orange                       | -33.283 | 149.100 | -       |
| H_AU_NSW_wn01 | Alves et al 2019 | 1919 | Australia | New South Wales   | Wandandian                   | -35.092 | 150.508 | -       |
| H_AU_QLD_ap01 | Alves et al 2019 | 1947 | Australia | Queensland        | Acacia Plateau               | -28.417 | 152.300 | -       |

|               |                  |      |           |                         |                    |         |         |   |
|---------------|------------------|------|-----------|-------------------------|--------------------|---------|---------|---|
| H_AU_QLD_ap02 | Alves et al 2019 | 1947 | Australia | Queensland              | Acacia Plateau     | -28.417 | 152.300 | - |
| H_AU_QLD_ar01 | Alves et al 2019 | 1947 | Australia | Queensland              | Acacia Ridge       | -27.583 | 153.017 | - |
| H_AU_QLD_ar02 | Alves et al 2019 | 1947 | Australia | Queensland              | Acacia Ridge       | -27.583 | 153.017 | - |
| H_AU_QLD_ar03 | Alves et al 2019 | 1947 | Australia | Queensland              | Acacia Ridge       | -27.583 | 153.017 | - |
| H_AU_QLD_st01 | Alves et al 2019 | 1941 | Australia | Queensland              | Stanthorpe area    | -28.650 | 151.933 | - |
| H_AU_QLD_st02 | Alves et al 2019 | 1941 | Australia | Queensland              | Stanthorpe area    | -28.650 | 151.933 | - |
| H_AU_VIC_gv01 | Alves et al 2019 | 1903 | Australia | Victoria                | Goulburn Valley    | -36.895 | 145.314 | - |
| H_AU_VIC_ky01 | Alves et al 2019 | 1911 | Australia | Victoria                | Kyneton            | -37.248 | 144.454 | - |
| H_AU_VIC_ma01 | Alves et al 2019 | 1910 | Australia | Victoria                | Macorna            | -35.917 | 144.033 | - |
| H_AU_VIC_mm01 | Alves et al 2019 | 1914 | Australia | Victoria                | Mitta Mitta        | -36.533 | 147.383 | - |
| H_AU_VIC_sa01 | Alves et al 2019 | 1909 | Australia | Victoria                | St Arnaud          | -36.617 | 143.250 | - |
| M_DO_BHA_aa01 | New data         | -    | Domestic  | -                       | Belgian Hare       | -       | -       | - |
| M_DO_CSL_aa01 | New data         | -    | Domestic  | -                       | Champagne Silver   | -       | -       | - |
| M_DO_ESL_aa01 | New data         | -    | Domestic  | -                       | English Silver     | -       | -       | - |
| M_DO_FAB_aa01 | New data         | -    | Domestic  | -                       | Fauve de Bourgogne | -       | -       | - |
| M_DO_FLG_aa01 | New data         | -    | Domestic  | -                       | Flemish Giant      | -       | -       | - |
| M_DO_FRA_aa01 | New data         | -    | Domestic  | -                       | French Angora      | -       | -       | - |
| M_DO_HIM_aa01 | New data         | -    | Domestic  | -                       | Himalayan          | -       | -       | - |
| M_DO_VWI_aa01 | New data         | -    | Domestic  | -                       | Vienna White       | -       | -       | - |
| M_FR_AIN_by01 | Alves et al 2019 | 2005 | France    | Ain                     | Beynost            | 45.840  | 5.002   | - |
| M_FR_AIN_sm01 | Alves et al 2019 | 2005 | France    | Ain                     | St Marcel          | 45.948  | 4.991   | - |
| M_FR_AIN_vd01 | Alves et al 2019 | 2005 | France    | Ain                     | Villars les Dombes | 46.002  | 5.037   | - |
| M_FR_AIN_vi01 | Alves et al 2019 | 2005 | France    | Ain                     | Villieu            | 45.920  | 5.222   | - |
| M_FR_ALP_au01 | Alves et al 2019 | 2005 | France    | Alpes-de-Haute-Provence | Aubignosc          | 44.129  | 5.970   | - |
| M_FR_ALP_th01 | Alves et al 2019 | 2005 | France    | Alpes-de-Haute-Provence | Thèze              | 44.319  | 5.922   | - |
| M_FR_BOU_ln01 | Alves et al 2019 | 2005 | France    | Bouches-du-Rhône        | Lançon de Provence | 43.592  | 5.127   | - |
| M_FR_GAR_ai01 | Alves et al 2019 | 2005 | France    | Gard                    | Aigremont          | 43.966  | 4.123   | - |



|               |                  |      |        |                         |                          |        |        |   |
|---------------|------------------|------|--------|-------------------------|--------------------------|--------|--------|---|
| M_FR_GAR_bg01 | Alves et al 2019 | 2005 | France | Gard                    | Bagard                   | 44.073 | 4.052  | - |
| M_FR_GAR_le01 | Alves et al 2019 | 2005 | France | Gard                    | Le Cailar                | 43.676 | 4.236  | - |
| M_FR_GAR_mc01 | Alves et al 2019 | 2005 | France | Gard                    | Mejannes le Clap         | 44.225 | 4.349  | - |
| M_FR_GAR_mg01 | Alves et al 2019 | 2005 | France | Gard                    | Marguerittes             | 43.863 | 4.433  | - |
| M_FR_GAR_qu01 | Alves et al 2019 | 2005 | France | Gard                    | Quissac                  | 43.911 | 3.999  | - |
| M_FR_GAR_sb01 | Alves et al 2019 | 2005 | France | Gard                    | St Ambroix               | 44.260 | 4.196  | - |
| M_FR_GAR_sg01 | Alves et al 2019 | 2005 | France | Gard                    | St Gilles                | 43.676 | 4.448  | - |
| M_FR_GAR_so01 | Alves et al 2019 | 2005 | France | Gard                    | Souvignargues            | 43.816 | 4.122  | - |
| M_FR_GAR_va01 | Alves et al 2019 | 2005 | France | Gard                    | Vauvert                  | 43.693 | 4.278  | - |
| M_FR_GER_lb01 | Alves et al 2019 | 2005 | France | Gers                    | Labastide-Saves          | 43.520 | 0.981  | - |
| M_FR_GIR_ce01 | Alves et al 2019 | 2002 | France | Gironde                 | Cérons                   | 44.631 | -0.338 | - |
| M_FR_GIR_pr01 | Alves et al 2019 | 2002 | France | Gironde                 | Preignac                 | 44.586 | -0.296 | - |
| M_FR_HER_cl01 | Alves et al 2019 | 2005 | France | Hérault                 | Claret                   | 43.862 | 3.906  | - |
| M_FR_RHO_qb01 | Alves et al 2019 | 2002 | France | Rhône                   | Quincie en Beaujolais    | 46.119 | 4.615  | - |
| M_FR_RHO_sl01 | Alves et al 2019 | 2002 | France | Rhône                   | St Genis Laval           | 45.692 | 4.793  | - |
| M_FR_RHO_sr01 | Alves et al 2019 | 2002 | France | Rhône                   | St Germain-Nuelles       | 45.850 | 4.611  | - |
| M_FR_TEG_mr01 | Alves et al 2019 | 2005 | France | Tarn-et-Garonne         | Marignac                 | 43.844 | 0.912  | - |
| M_FR_VAU_cu01 | Alves et al 2019 | 2012 | France | Vaucluse                | Caumont sur Durance      | 43.894 | 4.943  | - |
| H_FR_AIN_bi01 | Alves et al 2019 | 1925 | France | Ain                     | Birieux                  | 45.953 | 5.039  | - |
| H_FR_AIN_vd01 | Alves et al 2019 | 1928 | France | Ain                     | Villars-les-Dombes       | 46.002 | 5.029  | - |
| H_FR_AIN_vd02 | Alves et al 2019 | 1908 | France | Ain                     | Villars-les-Dombes       | 46.002 | 5.029  | - |
| H_FR_AIN_vd03 | Alves et al 2019 | 1925 | France | Ain                     | Villars-les-Dombes       | 46.002 | 5.029  | - |
| H_FR_AIN_vd04 | Alves et al 2019 | 1925 | France | Ain                     | Villars-les-Dombes       | 46.002 | 5.029  | - |
| H_FR_ALP_di01 | Alves et al 2019 | 1908 | France | Alpes-de-Haute-Provence | Digne, Basses Alpes      | 44.092 | 6.236  | - |
| H_FR_ALP_di02 | Alves et al 2019 | 1908 | France | Alpes-de-Haute-Provence | vers Digne, Basses Alpes | 44.092 | 6.236  | - |
| H_FR_ALP_di03 | Alves et al 2019 | 1908 | France | Alpes-de-Haute-Provence | vers Digne, Basses Alpes | 44.092 | 6.236  | - |
| H_FR_ALP_di04 | Alves et al 2019 | 1908 | France | Alpes-de-Haute-Provence | vers Digne, Basses Alpes | 44.092 | 6.236  | - |
| H_FR_BOU_ca01 | Alves et al 2019 | 1956 | France | Bouches-du-Rhône        | Camargue                 | 43.590 | 4.384  | - |
| H_FR_BOU_ca02 | Alves et al 2019 | 1952 | France | Bouches-du-Rhône        | Camargue, Tour du valat  | 43.590 | 4.384  | - |
| H_FR_BOU_ca03 | Alves et al 2019 | 1952 | France | Bouches-du-Rhône        | Camargue, Tour du valat  | 43.590 | 4.384  | - |
| H_FR_BOU_ca04 | Alves et al 2019 | 1953 | France | Bouches-du-Rhône        | Camargue, Tour du valat  | 43.590 | 4.384  | - |
| H_FR_BOU_ca05 | Alves et al 2019 | 1953 | France | Bouches-du-Rhône        | Camargue, Tour du valat  | 43.590 | 4.384  | - |

|               |                  |      |                |                  |                         |         |         |   |
|---------------|------------------|------|----------------|------------------|-------------------------|---------|---------|---|
| H_FR_BOU_ca06 | Alves et al 2019 | 1952 | France         | Bouches-du-Rhône | Camargue, Tour du valat | 43.590  | 4.384   | - |
| H_FR_GAR_ga01 | Alves et al 2019 | 1907 | France         | Gard             | Gard                    | 43.945  | 4.151   | - |
| H_FR_GAR_ga02 | Alves et al 2019 | 1932 | France         | Gard             | Gard                    | 43.945  | 4.151   | - |
| H_FR_GAR_ga03 | Alves et al 2019 | 1907 | France         | Gard             | Gard                    | 43.945  | 4.151   | - |
| H_FR_GAR_gj01 | Alves et al 2019 | 1908 | France         | Gard             | Gajan                   | 43.897  | 4.215   | - |
| H_FR_GAR_gj02 | Alves et al 2019 | 1908 | France         | Gard             | Gajan                   | 43.897  | 4.215   | - |
| H_FR_GAR_po01 | Alves et al 2019 | 1908 | France         | Gard             | Poulx                   | 43.911  | 4.424   | - |
| H_FR_GAR_po02 | Alves et al 2019 | 1908 | France         | Gard             | Poulx                   | 43.911  | 4.424   | - |
| H_FR_GAR_po03 | Alves et al 2019 | 1908 | France         | Gard             | Poulx                   | 43.911  | 4.424   | - |
| H_FR_GAR_sd01 | Alves et al 2019 | 1932 | France         | Gard             | St Génès de Malgoirès   | 43.946  | 4.214   | - |
| H_FR_GAR_sg01 | Alves et al 2019 | 1908 | France         | Gard             | St Gilles               | 43.677  | 4.434   | - |
| H_FR_LOI_ne01 | Alves et al 2019 | 1943 | France         | Loir et Cher     | Neuvy                   | 47.563  | 1.603   | - |
| H_FR_LOI_ne02 | Alves et al 2019 | 1943 | France         | Loir et Cher     | Neuvy                   | 47.563  | 1.603   | - |
| H_FR_RHO_ec01 | Alves et al 2019 | 1900 | France         | Rhône            | Ecully                  | 45.775  | 4.779   | - |
| H_FR_SAO_sv01 | Alves et al 2019 | 1908 | France         | Saône-et-Loire   | Saint-Verand            | 45.905  | 4.508   | - |
| M_NZ_BOP_tp01 | New data         | 2013 | New Zealand    | Bay of Plenty    | Te Puke                 | -37.830 | 176.330 | - |
| M_NZ_CAN_sh01 | New data         | 2012 | New Zealand    | Canterbury       | Simons Hill             | -44.198 | 170.299 | - |
| M_NZ_MAR_mo01 | New data         | 2013 | New Zealand    | Marlborough      | Molesworth              | -42.159 | 173.092 | - |
| M_NZ_SOU_ws01 | New data         | 2013 | New Zealand    | Southland        | Wantwood Station Gore   | -45.990 | 168.765 | - |
| M_NZ_WEL_ov01 | New data         | 2012 | New Zealand    | Wellington       | Orongorongo Valley      | -41.396 | 174.918 | - |
| M_TS_TAS_lf01 | New data         | 2012 | Tasmania       | Tasmania         | Longford                | -41.560 | 147.119 | - |
| M_TS_TAS_sf01 | New data         | 2017 | Tasmania       | Tasmania         | Sandford                | -42.928 | 147.524 | - |
| M_UK_BUK_hw01 | Alves et al 2019 | 2012 | United Kingdom | Buckinghamshire  | High Wycombe            | 51.635  | -0.810  | - |
| M_UK_CAM_md01 | Alves et al 2019 | 2012 | United Kingdom | Cambridgeshire   | Madingley               | 52.221  | 0.046   | - |
| M_UK_CAM_md02 | Alves et al 2019 | 2012 | United Kingdom | Cambridgeshire   | Madingley               | 52.228  | 0.043   | - |
| M_UK_CAM_pt01 | Alves et al 2019 | 2012 | United Kingdom | Cambridgeshire   | Peterborough            | 52.542  | -0.325  | - |
| M_UK_CAM_pt02 | Alves et al 2019 | 2012 | United Kingdom | Cambridgeshire   | Peterborough            | 52.540  | -0.323  | - |
| M_UK_DEV_lt01 | Alves et al 2019 | 2012 | United Kingdom | Devon            | Lettaford               | 50.641  | -3.837  | - |
| M_UK_DEV_lt02 | Alves et al 2019 | 2012 | United Kingdom | Devon            | Lettaford               | 50.641  | -3.837  | - |
| M_UK_ESS_lg01 | Alves et al 2019 | 2012 | United Kingdom | Essex            | Langham                 | 51.943  | 0.935   | - |
| M_UK_ESU_pp01 | Alves et al 2019 | 2012 | United Kingdom | East Sussex      | Plumpton                | 50.892  | -0.042  | - |
| M_UK_ESU_pp02 | Alves et al 2019 | 2012 | United Kingdom | East Sussex      | Plumpton                | 50.892  | -0.042  | - |
| M_UK_HAM_ss01 | Alves et al 2019 | 2012 | United Kingdom | Hampshire        | Sutton Scotney          | 51.154  | -1.338  | - |

|               |                  |      |                |                  |                           |        |        |   |
|---------------|------------------|------|----------------|------------------|---------------------------|--------|--------|---|
| M_UK_HAM_ss02 | Alves et al 2019 | 2012 | United Kingdom | Hampshire        | Sutton Scotney            | 51.154 | -1.338 | - |
| M_UK_KEN_gd01 | Alves et al 2019 | 2012 | United Kingdom | Kent             | Goodnestone               | 51.319 | 0.930  | - |
| M_UK_KEN_gd02 | Alves et al 2019 | 2012 | United Kingdom | Kent             | Goodnestone               | 51.319 | 0.930  | - |
| M_UK_KEN_hr01 | Alves et al 2019 | 2012 | United Kingdom | Kent             | Harrietsham               | 51.247 | 0.679  | - |
| M_UK_NTP_ha01 | Alves et al 2019 | 2012 | United Kingdom | Northamptonshire | Harlestone                | 52.281 | -0.982 | - |
| M_UK_NTP_pd01 | Alves et al 2019 | 2012 | United Kingdom | Northamptonshire | Preston Deanery           | 52.186 | -0.845 | - |
| M_UK_SRP_sh01 | Alves et al 2019 | 2012 | United Kingdom | Shropshire       | Shrewsbury                | 52.663 | -2.678 | - |
| M_UK_STA_we01 | Alves et al 2019 | 2012 | United Kingdom | Staffordshire    | Weston Park, Tong         | 52.667 | -2.303 | - |
| M_UK_SUF_ww01 | Alves et al 2019 | 2012 | United Kingdom | Suffolk          | Walsham le Willows        | 52.303 | 0.920  | - |
| M_UK_SUF_ww02 | Alves et al 2019 | 2012 | United Kingdom | Suffolk          | Walsham le Willows        | 52.303 | 0.920  | - |
| M_UK_SUR_cp01 | Alves et al 2019 | 2012 | United Kingdom | Surrey           | Capel                     | 51.151 | -0.312 | - |
| M_UK_SUR_cp02 | Alves et al 2019 | 2012 | United Kingdom | Surrey           | Capel                     | 51.115 | -0.324 | - |
| M_UK_WSU_pg01 | Alves et al 2019 | 2012 | United Kingdom | West Sussex      | Partridge Green           | 50.963 | -0.296 | - |
| M_UK_WSU_pg02 | Alves et al 2019 | 2012 | United Kingdom | West Sussex      | Partridge Green           | 50.963 | -0.296 | - |
| H_UK_BUK_ml01 | Alves et al 2019 | 1912 | United Kingdom | Buckinghamshire  | Marlow                    | 51.575 | -0.780 | - |
| H_UK_BUK_ml02 | Alves et al 2019 | 1912 | United Kingdom | Buckinghamshire  | Marlow                    | 51.575 | -0.780 | - |
| H_UK_CAM_as01 | Alves et al 2019 | 1954 | United Kingdom | Cambridgeshire   | Peterborough, Ashton Wold | 52.637 | -0.374 | - |
| H_UK_CAM_as02 | Alves et al 2019 | 1954 | United Kingdom | Cambridgeshire   | Peterborough, Ashton Wold | 52.637 | -0.374 | - |
| H_UK_DEV_ht01 | Alves et al 2019 | 1937 | United Kingdom | Devon            | Hatherleigh               | 50.819 | -4.072 | - |
| H_UK_DEV_kb01 | Alves et al 2019 | 1876 | United Kingdom | Devon            | Near Kingsbridge          | 50.284 | -3.777 | - |
| H_UK_DOR_se01 | Alves et al 2019 | 1934 | United Kingdom | Dorset           | Seatown, Bridport         | 50.722 | -2.824 | - |
| H_UK_DOR_se03 | Alves et al 2019 | 1893 | United Kingdom | Dorset           | Bridport, Near Seatown    | 50.722 | -2.824 | - |
| H_UK_ESU_dt01 | Alves et al 2019 | 1908 | United Kingdom | East Sussex      | Ditchling                 | 50.918 | -0.116 | - |
| H_UK_GLA_pe01 | Alves et al 2019 | 1914 | United Kingdom | Glamorgan        | Pendolyan                 | 51.482 | -3.356 | - |
| H_UK_HAM_an01 | Alves et al 2019 | 1944 | United Kingdom | Hampshire        | Andover                   | 51.211 | -1.492 | - |
| H_UK_HAM_ev01 | Alves et al 2019 | 1894 | United Kingdom | Hampshire        | Eversley                  | 51.352 | -0.889 | - |
| H_UK_HAM_em01 | Alves et al 2019 | 1928 | United Kingdom | Hampshire        | Emsworth                  | 50.848 | -0.938 | - |
| H_UK_HER_bk01 | Alves et al 2019 | 1903 | United Kingdom | Hertfordshire    | Berkhamsptead             | 51.760 | -0.568 | - |
| H_UK_KEN_ke02 | Alves et al 2019 | 1869 | United Kingdom | Kent             | Kent                      | 51.279 | 0.522  | - |
| H_UK_KEN_pl01 | Alves et al 2019 | 1912 | United Kingdom | Kent             | Pluckley, Surrenden Park  | 51.174 | 0.771  | - |
| H_UK_KEN_pl02 | Alves et al 2019 | 1912 | United Kingdom | Kent             | Pluckley, Surrenden Park  | 51.174 | 0.771  | - |
| H_UK_KEN_pl03 | Alves et al 2019 | 1912 | United Kingdom | Kent             | Pluckley, Surrenden Park  | 51.174 | 0.771  | - |
| H_UK_NTP_nt01 | Alves et al 2019 | 1882 | United Kingdom | Northamptonshire | -                         | 52.273 | -0.876 | - |

|               |                  |      |                |                  |                          |        |        |   |
|---------------|------------------|------|----------------|------------------|--------------------------|--------|--------|---|
| H_UK_NTP_sp01 | Alves et al 2019 | 1945 | United Kingdom | Northamptonshire | Spanhoe                  | 52.568 | -0.633 | - |
| H_UK_NTP_sp02 | Alves et al 2019 | 1945 | United Kingdom | Northamptonshire | Spanhoe                  | 52.568 | -0.633 | - |
| H_UK_SOM_cv01 | Alves et al 2019 | 1924 | United Kingdom | Somerset         | Clevedon                 | 51.442 | -2.856 | - |
| H_UK_SOM_cv02 | Alves et al 2019 | 1924 | United Kingdom | Somerset         | Cleredon                 | 51.442 | -2.856 | - |
| H_UK_STA_ch01 | Alves et al 2019 | 1925 | United Kingdom | Staffordshire    | Chartley                 | 52.852 | -1.988 | - |
| H_UK_STA_ch02 | Alves et al 2019 | 1925 | United Kingdom | Staffordshire    | Chartley                 | 52.852 | -1.988 | - |
| H_UK_STA_ch03 | Alves et al 2019 | 1925 | United Kingdom | Staffordshire    | Chartley                 | 52.852 | -1.988 | - |
| H_UK_STA_ut01 | Alves et al 2019 | 1925 | United Kingdom | Staffordshire    | Uttoxeter                | 52.898 | -1.866 | - |
| H_UK_SUR_cy01 | Alves et al 2019 | 1898 | United Kingdom | Surrey           | Croydon                  | 51.357 | -0.098 | - |
| H_UK_SUR_nd01 | Alves et al 2019 | 1934 | United Kingdom | Surrey           | Newdigate, Oaklands Park | 51.143 | -0.259 | - |
| H_UK_WSU_cw01 | Alves et al 2019 | 1865 | United Kingdom | West Sussex      | Cowfold                  | 50.991 | -0.273 | - |

<sup>a</sup> Sample code

<sup>b</sup> Publication source for sequencing data (\*Alves *et al.*, Parallel adaptation of rabbit populations to myxoma virus. *Science* **363**, 1319–1326 (2019))

<sup>c</sup> Year of collection/record

<sup>d</sup> Country of origin

<sup>e</sup> County (United Kingdom), State (Australia), or department (France) of origin

<sup>f</sup> Location (wild samples) or breed (domestic samples)

<sup>g</sup> Latitude

<sup>h</sup> Longitude

<sup>i</sup> Sample as representative of populations in analyses that require same number of individuals (*i.e.* Australian populations nucleotide diversity – Fig.5C and allele surfing Fig. 5D)

**Table S2** - Summary of the analyses of polymorphism and frequency spectrum tests of neutrality in the protein-coding sequence (CDS) variants. N corresponds to the number of individuals used in the analysis. Nucleotide diversity is measured as the average number of pairwise differences in a sample (69). Historical samples were excluded from the analysis.

| <b>Population</b>             | <b>n</b> | <b>Tajima's <i>D</i></b> | <b>Genetic Diversity</b> |
|-------------------------------|----------|--------------------------|--------------------------|
| France                        | 26       | 0.203                    | 0.1091%                  |
| Britain                       | 25       | 0.888                    | 0.0975%                  |
| Australia                     | 40       | 1.123                    | 0.0855%                  |
| New Zealand                   | 5        | 0.462                    | 0.0737%                  |
| Domestic                      | 8        | 0.616                    | 0.0701%                  |
| Tasmania                      | 2        | 0.185                    | 0.0574%                  |
| Australia (Victoria/NSW)      | 7        | 0.716                    | 0.0803%                  |
| Australia (Queensland)        | 7        | 0.736                    | 0.0770%                  |
| Australia (South Australia)   | 7        | 0.604                    | 0.0717%                  |
| Australia (Western Australia) | 7        | 0.732                    | 0.0703%                  |
| Australia (Sydney)            | 4        | 0.379                    | 0.0615%                  |
| Australia (Cattai)            | 1        | -                        | 0.0414%                  |
